# Supplementary material for: Prognostic factors associated with failure of total elbow replacement: a protocol for a systematic review
Source: HighWire-hosted journal article supplement (doi:10.1136/bmjopen-2023-071705), 2023-08-01
Supplement: bmjopen-2023-071705supp001_data_supplement.pdf [file bmjopen-2023-071705supp001_data_supplement.pdf]

**Supplementary File 1**Electronic search strategies

## MEDLINE search - Ovid interface

| # | Query                                                                                                                                                                                                                                                                                                                     |
|---|---------------------------------------------------------------------------------------------------------------------------------------------------------------------------------------------------------------------------------------------------------------------------------------------------------------------------|
| 1 | exp Arthroplasty, Replacement, Elbow/                                                                                                                                                                                                                                                                                     |
| 2 | total elbow replac*.mp. [mp=title, book title, abstract, original title, name of substance word, subject heading word, floating sub-heading word, keyword heading word, organism supplementary concept word, protocol supplementary concept word, rare disease supplementary concept word, unique identifier, synonyms]   |
| 3 | total elbow arthropl*.mp. [mp=title, book title, abstract, original title, name of substance word, subject heading word, floating sub-heading word, keyword heading word, organism supplementary concept word, protocol supplementary concept word, rare disease supplementary concept word, unique identifier, synonyms] |
| 4 | (total and elbow and replac*).ab.                                                                                                                                                                                                                                                                                         |
| 5 | (total and elbow and replac*).ti.                                                                                                                                                                                                                                                                                         |
| 6 | (total and elbow and arthropl*).ab.                                                                                                                                                                                                                                                                                       |
| 7 | (total and elbow and arthropl*).ti.                                                                                                                                                                                                                                                                                       |
| 8 | ((elbow adj2 arthroplast*) or (elbow adj2 replac*)).mp.                                                                                                                                                                                                                                                                   |
| 9 | 1 or 2 or 3 or 4 or 5 or 6 or 7 or 8                                                                                                                                                                                                                                                                                      |

## EMBASE search- Ovid interface

| # | Query                                                                                                                                                                                                                         |
|---|-------------------------------------------------------------------------------------------------------------------------------------------------------------------------------------------------------------------------------|
| 1 | exp elbow replacement/ or exp elbow arthroplasty/                                                                                                                                                                             |
| 2 | total elbow replac*.mp. [mp=title, abstract, heading word, drug trade name, original title, device manufacturer, drug manufacturer, device trade name, keyword heading word, floating subheading word, candidate term word]   |
| 3 | total elbow arthropl*.mp. [mp=title, abstract, heading word, drug trade name, original title, device manufacturer, drug manufacturer, device trade name, keyword heading word, floating subheading word, candidate term word] |

|    |                                                         |
|----|---------------------------------------------------------|
| 4  | (total and elbow and replac*).ab.                       |
| 5  | (total and elbow and replac*).ti.                       |
| 6  | (total and elbow and arthropl*).ab.                     |
| 7  | (total and elbow and arthropl*).ti.                     |
| 8  | ((elbow adj2 arthroplast*) or (elbow adj2 replac*)).mp. |
| 9  | 1 or 2 or 3 or 4 or 5 or 6 or 7 or 8                    |
| 10 | limit 9 to conference abstract status                   |
| 11 | 9 not 10                                                |

## PubMed search

| ID | Search                                                                                                                                                                                                                                                                                                                                                                                                                                                                                                                                                                 |
|----|------------------------------------------------------------------------------------------------------------------------------------------------------------------------------------------------------------------------------------------------------------------------------------------------------------------------------------------------------------------------------------------------------------------------------------------------------------------------------------------------------------------------------------------------------------------------|
| #1 | "Arthroplasty, Replacement, Elbow"[Mesh]                                                                                                                                                                                                                                                                                                                                                                                                                                                                                                                               |
| #2 | total elbow replac*<br>("total"[All Fields] OR "totaled"[All Fields] OR "totaling"[All Fields] OR "totalled"[All Fields] OR "totalling"[All Fields] OR "totals"[All Fields]) AND ("elbow"[MeSH Terms] OR "elbow"[All Fields] OR "elbow joint"[MeSH Terms] OR ("elbow"[All Fields] AND "joint"[All Fields]) OR "elbow joint"[All Fields] OR "elbow s"[All Fields] OR "elbows"[All Fields]) AND "arthropl*" [All Fields]                                                                                                                                                 |
| #3 | total elbow arthropl*<br>("total"[All Fields] OR "totaled"[All Fields] OR "totaling"[All Fields] OR "totalled"[All Fields] OR "totalling"[All Fields] OR "totals"[All Fields]) AND ("elbow"[MeSH Terms] OR "elbow"[All Fields] OR "elbow joint"[MeSH Terms] OR ("elbow"[All Fields] AND "joint"[All Fields]) OR "elbow joint"[All Fields] OR "elbow s"[All Fields] OR "elbows"[All Fields]) AND "replac*" [All Fields]                                                                                                                                                 |
| #4 | "total"[Title/Abstract] AND "elbow"[Title/Abstract] AND "replac*" [Title/Abstract]                                                                                                                                                                                                                                                                                                                                                                                                                                                                                     |
| #5 | "total"[Title/Abstract] AND "elbow"[Title/Abstract] AND "arthropl*" [Title/Abstract]                                                                                                                                                                                                                                                                                                                                                                                                                                                                                   |
| #6 | (elbow n2 arthropl*) OR (elbow n2 replac*)<br>(("elbow"[MeSH Terms] OR "elbow"[All Fields] OR "elbow joint"[MeSH Terms] OR ("elbow"[All Fields] AND "joint"[All Fields]) OR "elbow joint"[All Fields] OR "elbow s"[All Fields] OR "elbows"[All Fields]) AND "n2"[All Fields] AND "arthropl*" [All Fields]) OR ("elbow"[MeSH Terms] OR "elbow"[All Fields] OR "elbow joint"[MeSH Terms] OR ("elbow"[All Fields] AND "joint"[All Fields]) OR "elbow joint"[All Fields] OR "elbow s"[All Fields] OR "elbows"[All Fields]) AND "n2"[All Fields] AND "replac*" [All Fields] |
| #9 | 1 or 2 or 3 or 4 or 5 or 6                                                                                                                                                                                                                                                                                                                                                                                                                                                                                                                                             |

## Cochrane library search

| ID | Search                                                                                |
|----|---------------------------------------------------------------------------------------|
| #1 | MeSH descriptor: [Arthroplasty, Replacement, Elbow] explode all trees                 |
| #2 | total elbow replac*                                                                   |
| #3 | total elbow arthropl*                                                                 |
| #4 | (Total) AND (Elbow) AND ("replac*"or"arthropl*") (Word variations have been searched) |
| #5 | #1 OR #2 OR #3 OR #4                                                                  |
